# Supplementary material for: Simulated microgravity induces nuclear translocation of Bax and BCL-2 in glial cultured C6 cells
Source: PubMed Central journal article supplement — Heliyon. 2019 Jun 14;5(6):e01798. doi: 10.1016/j.heliyon.2019.e01798 (PMC6580195; doi:10.1016/j.heliyon.2019.e01798), 2019-06-14
Supplement: mmc1.pdf [file mmc1.pdf]

## Protein pattern stained by Red Ponceau

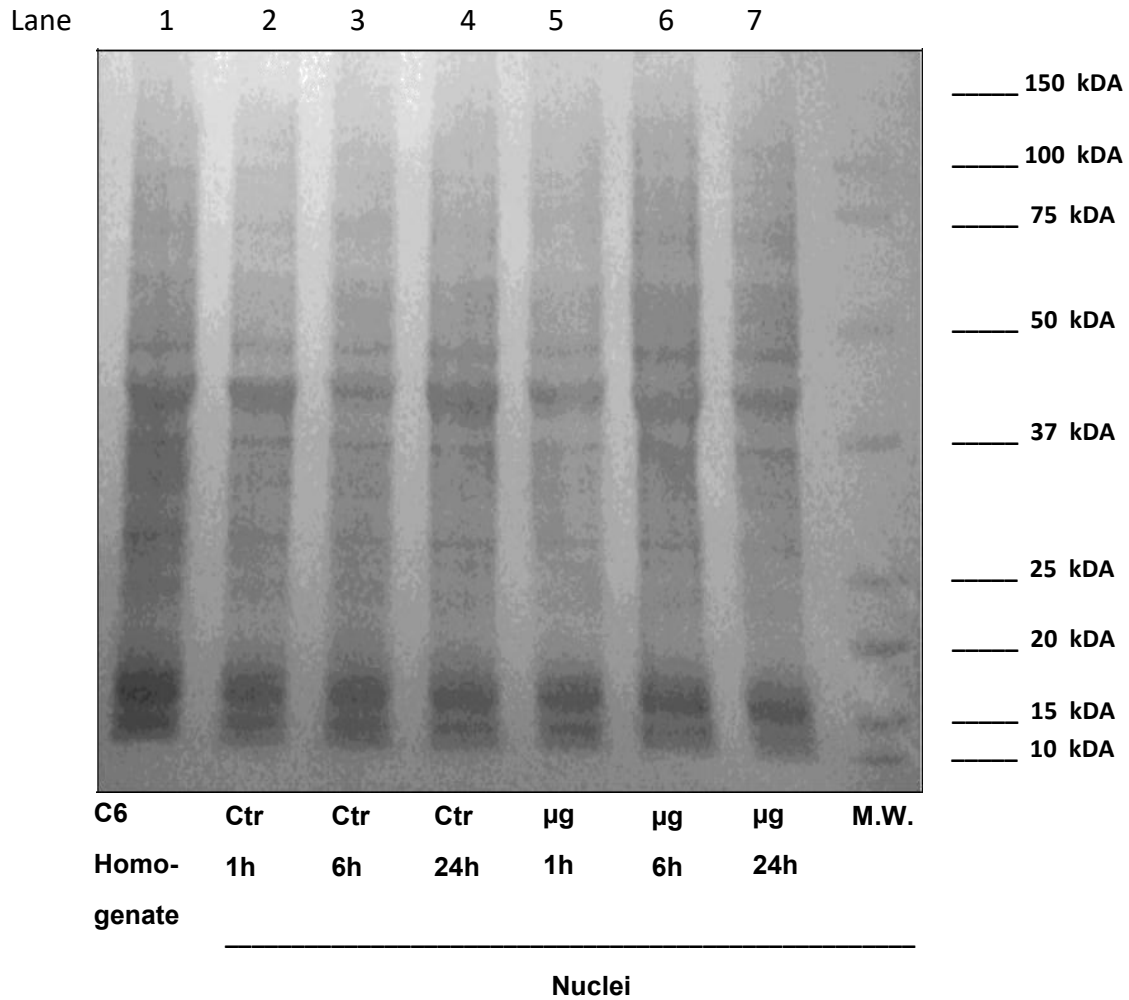

**Supplementary 1.** WB on C6 homogenate (used as positive control) and isolated nuclei of C6 glioma cells. For each panel, the samples loaded were: lane 1, C6 glioma cells homogenate (used as control); lane 2, nuclei from untreated C6 glioma cells (time 1 hour); lane 3, nuclei from untreated C6 glioma cells (time 6 hours); lane 4, nuclei from untreated C6 glioma cells (time 24 hours); lane 5, nuclei from C6 glioma cells treated with microgravity ( $\mu\text{g}$ ) for 1 hour; lane 6, nuclei from C6 glioma cells treated with  $\mu\text{g}$  for 6 hours; lane 7, nuclei from C6 glioma cells treated with  $\mu\text{g}$  for 24 hours.
