# Supplementary material for: Simulated microgravity induces nuclear translocation of Bax and BCL-2 in glial cultured C6 cells
Source: PubMed Central journal article supplement — Heliyon. 2019 Jun 14;5(6):e01798. doi: 10.1016/j.heliyon.2019.e01798 (PMC6580195; doi:10.1016/j.heliyon.2019.e01798), 2019-06-14
Supplement: mmc7.pdf [file mmc7.pdf]

## Western Blot analysis against Bax protein

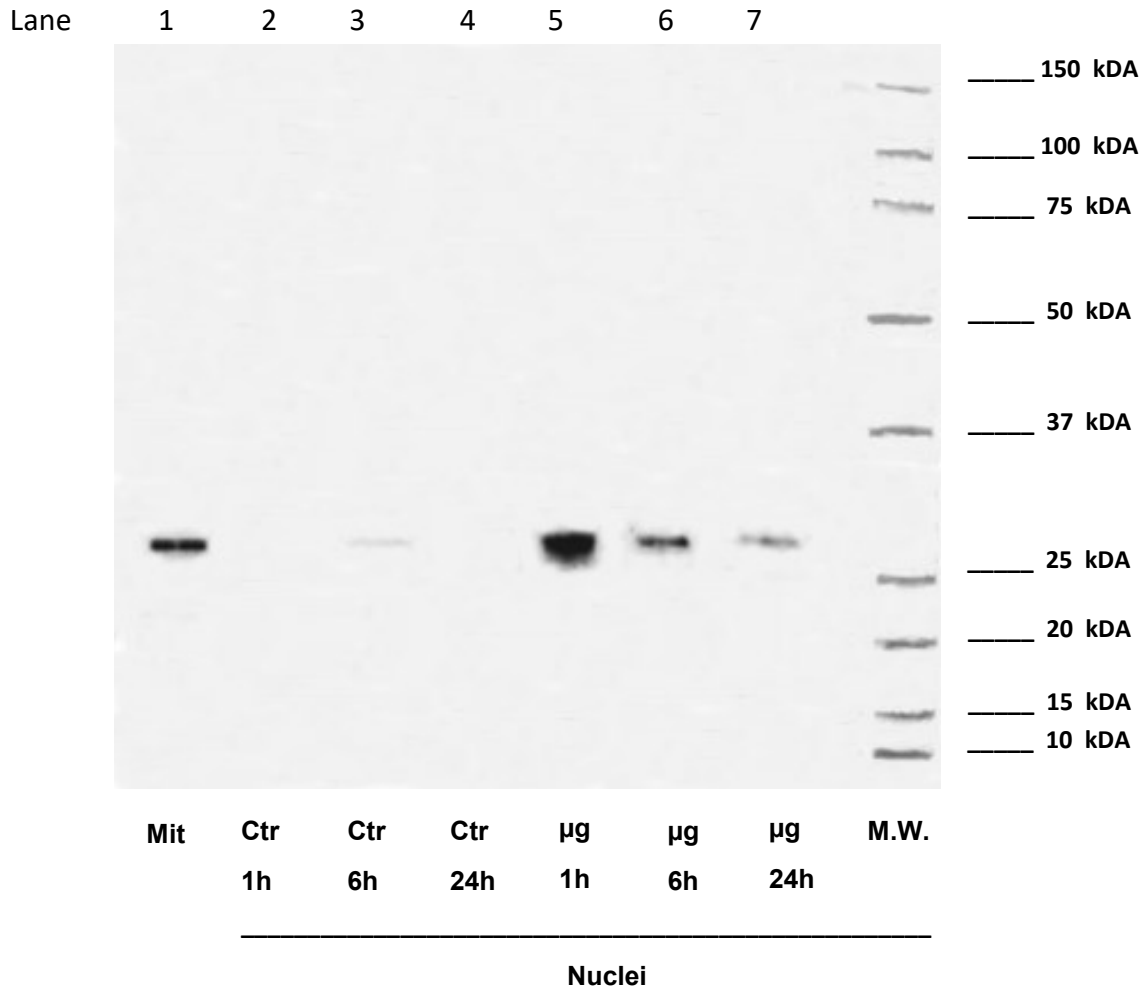

**Supplementary 7.** WB analyses on mitochondria enriched fraction (used as positive control) and isolated nuclei of C6 glioma cells. For each panels, the samples loaded were: lane 1, mitochondria enriched fraction (Mit); lane 2, nuclei from control C6 glioma cells (time 1 hour); lane 3, nuclei from control C6 glioma cells (time 6 hours); lane 4, nuclei from control C6 glioma cells (time 24 hours); lane 5, nuclei from C6 glioma cells treated with  $\mu\text{g}$  for 1 hour; lane 6, nuclei from C6 glioma cells treated with  $\mu\text{g}$  6 hours; lane 7, nuclei from C6 glioma cells treated with  $\mu\text{g}$  for 24 hours.
